# Supplementary material
Source: PubMed Central journal article supplement (PMC3409757)
Supplement: 1120437109_pnas.201120437SI.pdf [file 1120437109_pnas.201120437SI.pdf]

# Supporting Information

Elzi et al. 10.1073/pnas.1120437109

## SI Materials and Methods

**Protein Sample Preparation and Mass Spectrometry.** To induce senescence, MCF-7 cells were treated with 1  $\mu$ M doxorubicin for 2 h and then cultured without doxorubicin for 8 d. Senescent and control nonsenescent MCF-7 cells ( $2 \times 10^8$  each) were washed six times with PBS solution, and the medium was changed to DMEM without serum and with non-essential amino acids. The cells were cultured for another 24 h, and the culture supernatant was harvested. The supernatant was centrifuged, filtered through a 0.45- $\mu$ m filter (Millipore), and concentrated by using a 3,000-Da-cutoff Centriprep spin column (Millipore). The sample was further concentrated by using a 3,000-Da-cutoff Microcon spin column (Amicon). This procedure yielded  $\sim$ 700  $\mu$ g each protein from senescent and nonsenescent MCF-7 cells, which was used for cleavable isotope-coded affinity tag (ICAT) reagent labeling (senescent cell sample was labeled with isotopically-light ICAT reagent; control nonsenescent cell sample was labeled with isotopically-heavy ICAT reagent). The ICAT-labeled samples were processed and analyzed by microcapillary HPLC/tandem mass spectrometry by using a Thermo Fisher LTO mass spectrometer as described previously (1–3).

To identify IGFBP3-interacting proteins, forty 15-cm plates of 293T cells were transfected with C-terminally FLAG-His-tagged IGFBP3, and, 24 h later, the culture medium was changed to Opti-MEM (Invitrogen) without serum. Forty-eight hours after transfection, the culture supernatant was harvested, and IGFBP3-FLAG-His and its interacting proteins were purified by nickel agarose chromatography followed by anti-FLAG immunoprecipitation and elution with FLAG peptide. The eluted sample was processed with a Microcon YM-10 column (Millipore) for concentration and buffer change to 50 mM Tris, pH 8.5. The sample

was digested with trypsin (Promega) and was analyzed by microcapillary HPLC-tandem mass spectrometry by using a Thermo Fisher Orbitrap mass spectrometer.

Tandem mass spectra were searched against the human IPI protein database using SEQUEST (4). Peptide/protein identification was validated by Peptide/ProteinProphet software tools (5, 6). A ProteinProphet score of 0.9 was used as a cutoff. Protein abundance ratios were calculated by using ASAPRatio software tool (7).

**Antibodies.** The following antibodies were used for immunoblotting and immunofluorescence: goat polyclonal anti-IGFBP3 (C-19; Santa Cruz Biotechnology), rabbit polyclonal anti-plasminogen activator inhibitor 1 (PAI-1; H-135; Santa Cruz Biotechnology), goat polyclonal anti-PGK1 (Y-12; Santa Cruz Biotechnology), mouse monoclonal anti-Rb (G3-245; BD Pharmingen), rabbit polyclonal anti-p53 (FL-393; Santa Cruz Biotechnology), mouse monoclonal anti-p21 (SX118; BD Pharmingen), mouse monoclonal anti-FLAG (M2; Sigma-Aldrich), rabbit polyclonal anti-FLAG (RFLG-45A; Immunology Consultants Laboratory), mouse monoclonal anti-tubulin (DM1A; Sigma-Aldrich), rabbit monoclonal anti-phospho-histone H3 (3377; Cell Signaling Technology), rabbit polyclonal anti-AKT (9272; Cell Signaling Technology), rabbit polyclonal anti-phospho-AKT-Ser473 (4060; Cell Signaling Technology), rabbit anti-SPARC (H-90; Santa Cruz Biotechnology), mouse monoclonal anti-BrdU (555627; BD Pharmingen), rabbit polyclonal anti-BrdU (600-401-C29S; Rockland Immunochemicals), rabbit polyclonal anti-Ki-67 (15580; Abcam), and rabbit polyclonal anti-trimethylated lysine-9 histone H3 (8898; Abcam).

1. Gygi SP, et al. (1999) Quantitative analysis of complex protein mixtures using isotope-coded affinity tags. *Nat Biotechnol* 17:994–999.
2. Shioi Y, et al. (2002) Quantitative proteomic analysis of Myc oncoprotein function. *EMBO J* 21:5088–5096.
3. Lai Y, Qiao M, Song M, Weintraub ST, Shioi Y (2011) Quantitative proteomics identifies the Myb-binding protein p160 as a novel target of the von Hippel-Lindau tumor suppressor. *PLoS ONE* 6:e16975.
4. Eng J, McCormack AL, Yates JR (1994) An approach to correlate tandem mass spectral data of peptides with amino acid sequences in a protein database. *J Am Soc Mass Spectrom* 5:976–989.
5. Keller A, Nesvizhskii AI, Kolker E, Aebersold R (2002) Empirical statistical model to estimate the accuracy of peptide identifications made by MS/MS and database search. *Anal Chem* 74:5383–5392.
6. Nesvizhskii AI, Keller A, Kolker E, Aebersold R (2003) A statistical model for identifying proteins by tandem mass spectrometry. *Anal Chem* 75:4646–4658.
7. Li XJ, Zhang H, Ranish JA, Aebersold R (2003) Automated statistical analysis of protein abundance ratios from data generated by stable-isotope dilution and tandem mass spectrometry. *Anal Chem* 75:6648–6657.

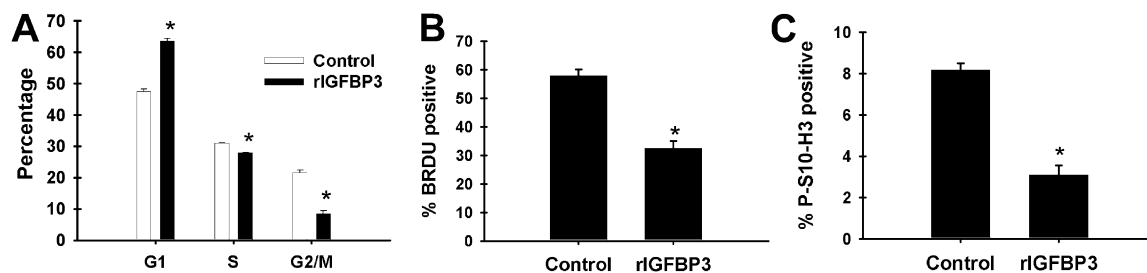

**Fig. S1.** Effect of recombinant IGFBP3 on MCF-7 cells. (A) MCF-7 cells were treated with 0.5  $\mu$ g/mL recombinant IGFBP3 for 4 d, and the cell cycle profile was determined by FACS analysis (\* $P < 0.05$  vs. control.) (B) BrdU incorporation (\* $P < 0.05$  vs. control). (C) Anti-phospho-histone H3 staining (\* $P < 0.05$  vs. control).

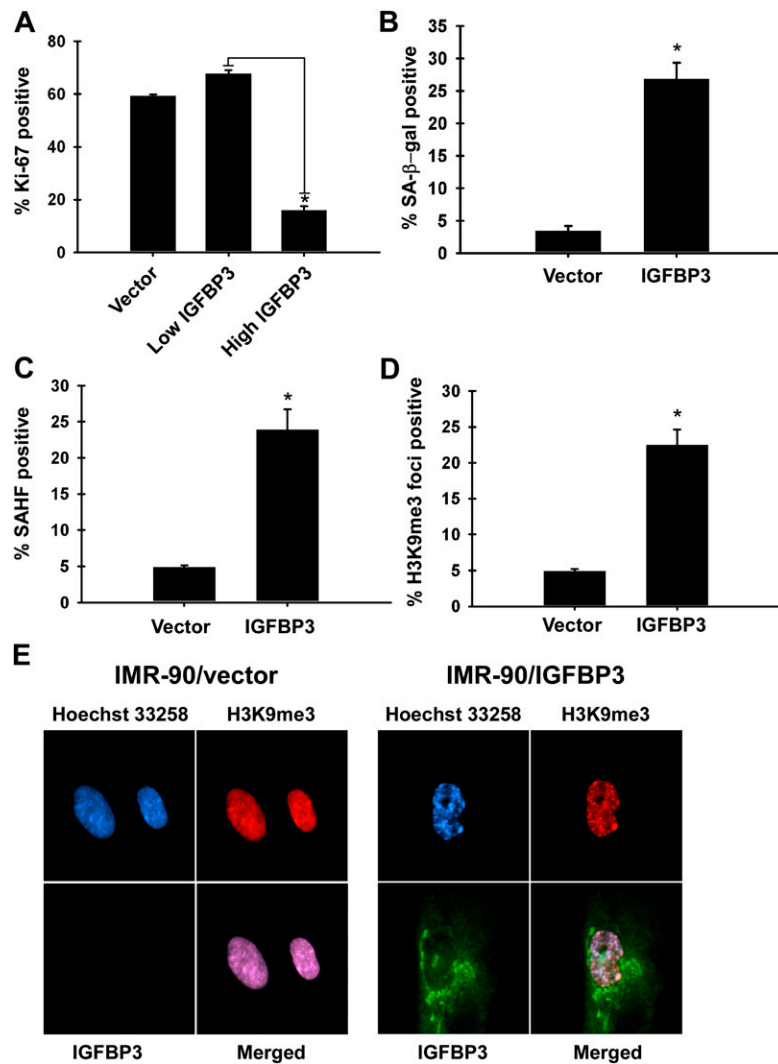

**Fig. S2.** IGFBP3 induces senescence in IMR-90 fibroblasts. (A) IGFBP3 abrogates Ki-67 staining. IMR-90 fibroblasts were infected with IGFBP3-expressing lentivirus or empty vector, and were stained for Ki-67 at 5 d after infection ( $*P < 0.05$ ). (B) IGFBP3 induces senescence-associated (SA)  $\beta$ -gal. IMR-90 fibroblasts were infected with IGFBP3-expressing lentivirus or empty vector. Five days after infection, the cells were stained for SA  $\beta$ -gal ( $*P < 0.05$ ). (C) IGFBP3 generates senescence-associated heterochromatic foci (SAHF). IMR-90 fibroblasts were infected with IGFBP3-expressing lentivirus or empty vector and the formation of SAHF was assessed by Hoechst 33258 staining ( $*P < 0.05$ ). (D) IGFBP3 generates lysine-9 trimethylated histone H3 foci. IMR-90 fibroblasts were infected with IGFBP3-expressing lentivirus or empty vector, and the formation of heterochromatic foci was assessed by anti-trimethylated histone H3 (lysine-9) staining ( $*P < 0.05$ ). (E) SAHF formation by IGFBP3. Representative images of the experiments in C and D are shown.



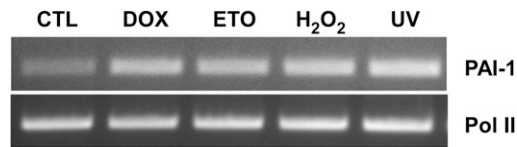

**Fig. S5.** PAI-1 is induced in response to different senescence-inducing stimuli. MCF-7 cells were treated with 1  $\mu$ M doxorubicin (DOX) for 2 h, 20  $\mu$ M etoposide (ETO) for 48 h, 500  $\mu$ M H<sub>2</sub>O<sub>2</sub> for 2 h, or 2 J/m<sup>2</sup> UV light. Four days after initiating each treatment, total RNA was isolated. Total RNA from untreated cells was also included as control (CTL). RT-PCR analysis was performed for mRNA levels of PAI-1 and RNA polymerase II (Pol II; loading control).

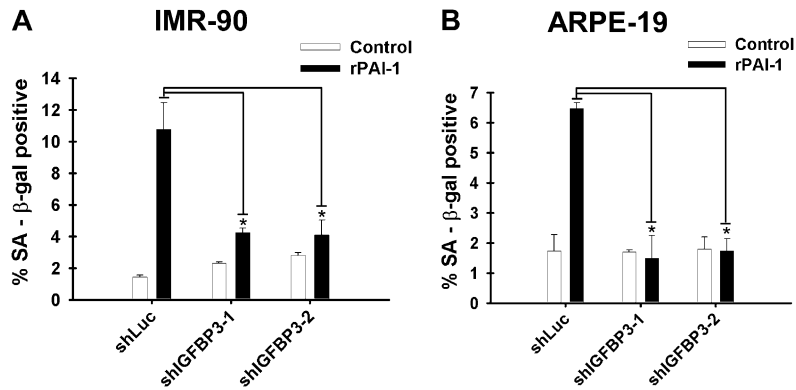

**Fig. S6.** IGFBP3 mediates PAI-1-induced senescence in IMR-90 and ARPE-19 cells. (A) IGFBP3 knockdown abrogates PAI-1-induced senescence in IMR-90 fibroblasts. IMR-90 cells were infected with lentiviruses expressing shRNAs against IGFBP3 or luciferase, treated with recombinant PAI-1 for 4 d, and stained for SA  $\beta$ -gal. (B) IGFBP3 knockdown abrogates PAI-1-induced senescence in ARPE-19 retinal pigment epithelial cells. ARPE-19 cells were infected with lentiviruses expressing shRNAs against IGFBP3 or luciferase, treated with recombinant PAI-1 for 4 d, and stained for SA  $\beta$ -gal.

**Dataset S1. List of proteins displaying more than twofold increased abundance in senescent MCF-7 conditioned medium**

[Dataset S1](#)

Protein abundance ratios (senescent MCF-7 conditioned medium/nonsenescent MCF-7 conditioned medium) were calculated using the ASAPRatio software tool. The dataset contains proteins with ProteinProphet probability score  $\geq 0.9$ .

**Dataset S2. List of proteins displaying more than twofold reduced abundance in senescent MCF-7 conditioned medium**

[Dataset S2](#)

The dataset contains proteins with ProteinProphet probability score  $\geq 0.9$ .

**Dataset S3. List of proteins identified in the IGFBP3-FLAG-His complex**

[Dataset S3](#)

The dataset contains proteins with ProteinProphet probability score  $\geq 0.9$ .
